# Supplementary figures and images for: Diagnostic Performance of 18F-FDG PET(CT) in Bone-Bone Marrow Involvement in Pediatric Neuroblastoma: A Systemic Review and Meta-Analysis
Source: Hindawi journal article supplement (doi:10.1155/2021/8125373), 2021-06-16

Deeks' Funnel Plot Asymmetry Test  
pvalue = 0.53

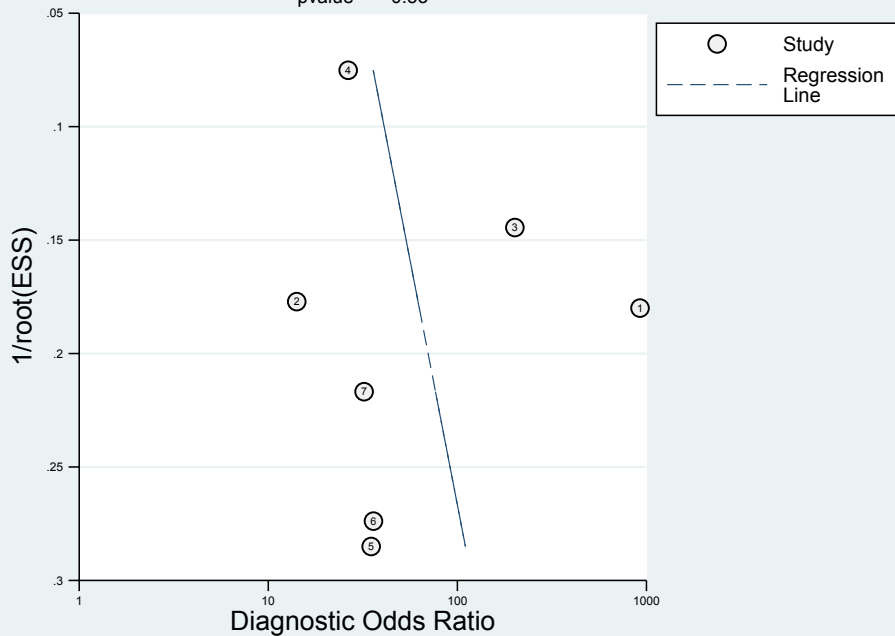

Supplement: f1 [file 8125373.f1.zip]
